# Supplementary material
Source: ML conference proceedings conference paper supplement (https://www.ecva.net/papers/eccv_2020/papers_ECCV/html/123650681_ECCV_2020_paper.php)
Supplement: Supplementary file 1 [file 123650681-supp.pdf]

# Reparameterizing Convolutions for Incremental Multi-Task Learning without Task Interference (Supplementary Material)

Menelaos Kanakis<sup>1</sup>, David Bruggemann<sup>1</sup>, Suman Saha<sup>1</sup>,  
Stamatios Georgoulis<sup>1</sup>, Anton Obukhov<sup>1</sup>, and Luc Van Gool<sup>1,2</sup>

<sup>1</sup> ETH Zurich

<sup>2</sup> KU Leuven

## A Implementation Details

We based our implementation details on the work of [8], listed below for completeness.

**Generic hyperparameters.** All models are optimized using SGD with a learning rate 0.005, momentum 0.9, weight decay 0.0001, and the “poly” learning rate schedule [1]. We use a single GPU with a minibatch of 8 images. The input images during training are augmented with random horizontal flips and random scaling in the range [0.5, 2.0] in 0.25 increments. The validity of these hyperparameters has already been tested in [8], and hence they are used in all our experiments too, in order to ensure fair comparisons amongst different methods.

**Dataset specific hyperparameters.** PASCAL-Context [10] models are trained for 60 epochs. The spatial size of the input images is  $512 \times 512$ . NYUD [13] models are trained for 200 epochs. The spatial size of the input images is  $425 \times 560$ . Images of insufficient size are padded with the mean color.

**Task weighting and loss functions.** As is common in multi-task learning (MTL), losses require careful loss weighting [8, 14, 4, 12], where each loss is task-dependent. For edge detection, we optimize the binary cross-entropy (BCE) loss, scaled by 50. Due to the class imbalance between the edge and non-edge pixels, edge pixels are penalized with a weight 0.95, while non-edge pixels with a scale of 0.05, accommodating [5, 7]. For evaluation, we set the maximum allowed mislocalization of the optimal dataset F-measure (odsF) [9] to 0.0075 and 0.011 for PASCAL-Context and NYUD, respectively, using the package of [11]. Semantic segmentation and human parts segmentation are optimized with cross-entropy loss, weighted by the factors of 1 and 2, respectively. Predictions of surface normals (normalized to unit vectors) and depth modalities are penalized using the  $\mathcal{L}_1$  loss, scaled by 10 and 1, respectively. Saliency is optimized using the BCE loss, weighted by a factor of 5.

**Table 1. Single-task baseline comparison.** We report the single-task performance of the baseline implementations of [8, 14] for similar architectures on PASCAL-Context. The arrow indicates the direction for better performance.

| Method       | Edge $\uparrow$ | SemSeg $\uparrow$ | Parts $\uparrow$ | Normals $\downarrow$ | Sal $\uparrow$ |
|--------------|-----------------|-------------------|------------------|----------------------|----------------|
| ASTMT [8]    | 70.30           | 63.90             | 55.90            | 15.10                | 63.90          |
| MTI-Net [14] | 68.20           | 64.49             | 57.43            | 14.77                | 66.38          |
| Ours         | <b>71.88</b>    | <b>66.22</b>      | <b>59.69</b>     | <b>13.64</b>         | <b>66.62</b>   |

## B Reparameterization Details

In Section 3.3 of the main text (Response initialization, RI), we introduced the methodology for the generation of a better filter bank  $W_s$  when compared to that directly learned by pre-training  $W_s$  on ImageNet, and demonstrated improved performance when utilizing RI in Section 4. In this section, we present additional detail.

Recall that we defined  $\mathbf{y} = f(\mathbf{x}; W^m) = W^m \mathbf{x}$  the responses of a convolutional layer for an input tensor  $\mathbf{x}$ , where  $W^m \in \mathbb{R}^{c_{out} \times k^2 c_{in}}$  are the pre-trained ImageNet weights. We specify  $Y \in \mathbb{R}^{c_{out} \times n}$  as a matrix containing  $n$  responses of  $\mathbf{y}$  with the mean vector  $\bar{\mathbf{y}}$  subtracted. To generate the new filter bank, we first compute the eigen-decomposition of the covariance matrix  $YY^T = USU^T$  (using Singular Value Decomposition, SVD), where  $U \in \mathbb{R}^{c_{out} \times c_{out}}$  is an orthogonal matrix with the eigenvectors on the columns, and  $S$  is a diagonal matrix of the corresponding eigenvalues. We can now utilize  $UU^T$  which acts as a method to project to ( $U^T$ ) and from ( $U$ ) a latent space. Thus, we can rewrite  $\mathbf{y} = UU^T(\mathbf{y} - \bar{\mathbf{y}}) + \bar{\mathbf{y}}$ , with the centering operation being of importance due to the space  $UU^T$  being generated from centred responses. This gives rise to

$$\begin{aligned}
 \mathbf{y} &= W^m \mathbf{x} = UU^T(W^m \mathbf{x} - \bar{\mathbf{y}}) + \bar{\mathbf{y}} \\
 \mathbf{y} &= UU^T W^m \mathbf{x} + (\bar{\mathbf{y}} - UU^T \bar{\mathbf{y}}) \\
 \mathbf{y} &= W_t^i W_s \mathbf{x} + b
 \end{aligned} \tag{1}$$

where  $W_t^i$ , initialized by  $U$ , represents the task-specific parameters optimized independently for each task  $i$ , and is implemented as a  $1 \times 1$  convolution. The non-trainable shared parameters are defined as  $W_s = U^T W^m$  and implemented as a  $k \times k$  convolution, with  $k$  being the filter size of  $W^m$ . The bias  $b$  can be added to the running mean of the batchnorm following the convolution [3].

## C Baseline

To ensure our re-implementation provides a stable baseline, Table 1 compares the single-task performance of our implementation using a ResNet-18 based DeepLabv3+, the results from [14] using a ResNet-18 based FPN [6], and the results from [8] who utilized a ResNet-26 based DeepLabv3+. We demonstrate

**Table 2.** Comparison with the single-task baseline on PASCAL-Context for a DeepLabv3+ with an R-34 backbone.

| Method      | Edge $\uparrow$ | SemSeg $\uparrow$ | Parts $\uparrow$ | Normals $\downarrow$ | Sal $\uparrow$ | $\Delta_m\%$ $\downarrow$ |
|-------------|-----------------|-------------------|------------------|----------------------|----------------|---------------------------|
| Single-task | 73.63           | 69.34             | 62.96            | 13.39                | 67.49          | -                         |
| RCM (ours)  | 72.87           | 69.11             | 61.41            | 13.71                | 67.69          | <b>1.18</b>               |

**Table 3.** Comparison with the single-task baseline on NYUD for a DeepLabv3+ with an R-34 backbone.

| Method      | Edge $\uparrow$ | SemSeg $\uparrow$ | Normals $\downarrow$ | Depth $\downarrow$ | $\Delta_m\%$ $\downarrow$ |
|-------------|-----------------|-------------------|----------------------|--------------------|---------------------------|
| Single-task | 70.13           | 37.39             | 21.47                | 0.54               | -                         |
| RCM (ours)  | 69.50           | 36.19             | 21.70                | 0.55               | <b>1.77</b>               |

that our single-task baseline outperforms both works on every task, and even though the numbers are not directly comparable due to minor implementation differences, it provides a verification of a strong baseline.

## D Additional Backbone Experiments

We additionally compare the proposed RCM (Reparameterized Convolutions for Multi-task learning) with respect to the single-task performance on the DeepLabv3+ with the deeper ResNet34 (R-34) [2] backbone. Results for PASCAL-Context [10] and NYUD [13] can be seen in Table 2 and Table 3, respectively. As seen, the percentage drops of 1.18% and 1.77% for PASCAL-Context and NYUD respectively are comparable to that of the ResNet18 backbone reported in the main paper.

## References

1. Chen, L.C., Papandreou, G., Kokkinos, I., Murphy, K., Yuille, A.L.: Deeplab: Semantic image segmentation with deep convolutional nets, atrous convolution, and fully connected crfs. *IEEE transactions on pattern analysis and machine intelligence* **40**(4), 834–848 (2017)
2. He, K., Zhang, X., Ren, S., Sun, J.: Deep residual learning for image recognition. In: *Proceedings of the IEEE conference on computer vision and pattern recognition*. pp. 770–778 (2016)
3. Ioffe, S., Szegedy, C.: Batch normalization: Accelerating deep network training by reducing internal covariate shift. In: *International Conference on Machine Learning*. pp. 448–456 (2015)
4. Kendall, A., Gal, Y., Cipolla, R.: Multi-task learning using uncertainty to weigh losses for scene geometry and semantics. In: *Proceedings of the IEEE conference on computer vision and pattern recognition*. pp. 7482–7491 (2018)
5. Kokkinos, I.: Pushing the boundaries of boundary detection using deep learning. *arXiv preprint arXiv:1511.07386* (2015)
6. Lin, T.Y., Dollár, P., Girshick, R., He, K., Hariharan, B., Belongie, S.: Feature pyramid networks for object detection. In: *Proceedings of the IEEE conference on computer vision and pattern recognition*. pp. 2117–2125 (2017)
7. Maninis, K.K., Pont-Tuset, J., Arbeláez, P., Van Gool, L.: Convolutional oriented boundaries: From image segmentation to high-level tasks. *IEEE transactions on pattern analysis and machine intelligence* **40**(4), 819–833 (2017)
8. Maninis, K.K., Radosavovic, I., Kokkinos, I.: Attentive single-tasking of multiple tasks. In: *Proceedings of the IEEE Conference on Computer Vision and Pattern Recognition*. pp. 1851–1860 (2019)
9. Martin, D.R., Fowlkes, C.C., Malik, J.: Learning to detect natural image boundaries using local brightness, color, and texture cues. *IEEE transactions on pattern analysis and machine intelligence* **26**(5), 530–549 (2004)
10. Mottaghi, R., Chen, X., Liu, X., Cho, N.G., Lee, S.W., Fidler, S., Urtasun, R., Yuille, A.: The role of context for object detection and semantic segmentation in the wild. In: *Proceedings of the IEEE Conference on Computer Vision and Pattern Recognition*. pp. 891–898 (2014)
11. Pont-Tuset, J., Marques, F.: Supervised evaluation of image segmentation and object proposal techniques. *IEEE transactions on pattern analysis and machine intelligence* **38**(7), 1465–1478 (2015)
12. Sener, O., Koltun, V.: Multi-task learning as multi-objective optimization. In: *Advances in Neural Information Processing Systems*. pp. 527–538 (2018)
13. Silberman, N., Hoiem, D., Kohli, P., Fergus, R.: Indoor segmentation and support inference from rgb-d images. In: *European conference on computer vision*. pp. 746–760. Springer (2012)
14. Vandenhende, S., Georgoulis, S., Van Gool, L.: Mti-net: Multi-scale task interaction networks for multi-task learning. *arXiv preprint arXiv:2001.06902* (2020)
